# Supplementary material for: Technical note: Influence of different averaging metrics and temporal resolutions on the aerosol pH calculated by thermodynamic modeling
Source: Copernicus journal article supplement (doi:10.5194/acp-24-6583-2024), 2024-06-06
Supplement: Supplementary file 1 [file acp-24-6583-2024-supplement.pdf]

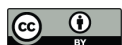

*Supplement of*

**Technical note: Influence of different averaging metrics and temporal resolutions on the aerosol pH calculated by thermodynamic modeling**

**Haoqi Wang et al.**

*Correspondence to:* Shaojie Song (songs@nankai.edu.cn)

The copyright of individual parts of the supplement might differ from the article licence.

- 15
- Texts S1–S2
  - Figures S1–S6
  - Tables S1–S3

## Text S1. Settings for the GEOS-Chem chemical transport model simulations

Emission databases were prepared using the Harvard-NASA Emissions Component (HEMCO, version 3.6.2, DOI: 10.5281/zenodo.7692950) as detailed in the work by Lin et al. (2021). Global anthropogenic emissions were obtained from the Community Emissions Data System (CEDS) for SO<sub>2</sub>, NO<sub>x</sub>, NH<sub>3</sub>, CO, VOCs, dust, primary organic carbon, and black carbon (Hoesly et al., 2018). Subsequently, the Multi-resolution Emission Inventory (MEIC, <http://meicmodel.org.cn>) covered mainland China (Li et al., 2017; Zheng et al., 2018). Previous studies indicated that bottom-up emission inventories may underestimate NH<sub>3</sub> emissions in northern China by approximately 40% (Zhang et al., 2018; Wang et al., 2018; Kong et al., 2019; Ruan et al., 2022). Hence, NH<sub>3</sub> emissions for the North China Plain region were multiplied by a factor of 1.4. Biogenic VOC emissions were calculated using the Model of Emissions of Gases and Aerosols from Nature (MEGAN, version 2.1) (Guenther et al., 2012). Biomass burning emissions were obtained from the Global Fire Emissions Database (GFED4, version 4.1) (Van Der Werf et al., 2017). Other emissions included volcanic SO<sub>2</sub> sources (Ge et al., 2016), lightning and soil NO<sub>x</sub> sources (Murray et al., 2012; Hudman et al., 2012), mineral dust emissions (Duncan et al., 2007), and natural NH<sub>3</sub> sources (<https://www.geiacenter.org>, last accessed 2024-02-16). The tropospheric chemistry mechanism encompassed detailed reactions for ozone–NO<sub>x</sub>–VOC–aerosol–halogen interactions. The parameterization scheme for the heterogeneous uptake of sulfate in KPP was referred to Wang et al. (2014) and Wang et al. (2021). Similar to earlier studies (Wang et al., 2024), an apparent reactive uptake coefficient for SO<sub>2</sub> was adopted to compensate for the underestimate of sulfate during the North China winter season, and the reactive uptake coefficient ( $\gamma$ ) was taken as  $10^{-4}$  at RH > 50%. Gaseous and particle dry deposition adhered to a conventional resistance-in-series scheme (Wesely, 1989). Wet deposition encompassed in-cloud scavenging, below-cloud scavenging, and scavenging within convective updrafts (Amos et al., 2012).

## Text S2. Theoretical calculations based on the multiphase buffer theory

Based on the multiphase buffer theory (Zheng et al., 2020), for gas-liquid multiphase systems, pH becomes a function of  $K_{a,NH_3}^*$  and the ratio of total  $NH_3$  in both gas and aqueous phase to  $NH_4^+$  in the aqueous phase.

$$pH = pK_{a,NH_3}^* + \log_{10} \frac{[NH_3(aq)] + [NH_3(g)]}{[a_{NH_4^+(aq)}]}$$

where

$$K_{a,NH_3}^* = \frac{[H^+(aq)]([NH_3(aq)] + [NH_3(g)])}{[a_{NH_4^+(aq)}]} = K_{a,NH_3} \left( 1 + \frac{1}{H_{NH_3} RTAWC} \right)$$

$$H_{NH_3} = \frac{[a_{NH_4^+(aq)}]}{p_{NH_3}} = \frac{1}{RTAWC} \frac{[a_{NH_4^+(aq)}]}{[NH_3(g)]}$$

$$[NH_3(g)] = \frac{p_{NH_3}}{RTAWC}$$

$$[a_{NH_4^+(aq)}] = [NH_4^+(aq)] \gamma_{NH_4^+(aq)}$$

$[NH_3(aq)]$  represents the molality of  $NH_3$  in aerosol liquid water ( $\text{mol kg}^{-1}$  water).  $[NH_3(g)]$  is an introduced parameter to represent the equivalent molality of gaseous  $NH_3$  in aerosol liquid water ( $\text{mol kg}^{-1}$  water).  $[NH_4^+(aq)]$  is the molality of  $NH_4^+$  in aerosol liquid water ( $\text{mol kg}^{-1}$  water).  $[a_{NH_4^+(aq)}]$  is the activity of  $NH_4^+$  in aerosol liquid water ( $\text{mol kg}^{-1}$  water).  $K_{a,NH_3}$  is the molality-based equilibrium constant for the acid dissociation of  $NH_4^+$  ( $\text{mol kg}^{-1}$ ).  $H_{NH_3}$  is Henry's law constant of  $NH_3$  in  $\text{mol kg}^{-1} \text{ atm}^{-1}$  ( $57.64 \text{ mol kg}^{-1} \text{ atm}^{-1}$  at  $298.15 \text{ K}$ ,  $208.02 \text{ mol kg}^{-1} \text{ atm}^{-1}$  at  $273.15 \text{ K}$ ).  $R$  is the gas constant ( $0.08205 \text{ atm L mol}^{-1} \text{ K}^{-1}$ ).  $T$  is temperature in  $\text{K}$ .  $AWC$  is the aerosol water content ( $\mu\text{g m}^{-3}$  air).  $p_{NH_3}$  is partial pressure of  $NH_3$  ( $\text{atm}$ ).  $c_{NH_4^+(aq)}$  is the mass concentration of  $NH_3$  in the atmosphere ( $\mu\text{g m}^{-3}$  air).  $\gamma_{NH_4^+(aq)}$  is the activity coefficient (unitless).

Taking  $K_{a,NH_3}^*$ , and  $H_{NH_3}$  into the calculation of pH, the formula can be simplified as follows:

$$\begin{aligned} pH &= pK_{a,NH_3}^* + \log_{10} \frac{[NH_3(aq)] + [NH_3(g)]}{[a_{NH_4^+(aq)}]} \\ &= -\log_{10} \left( K_{a,NH_3} \frac{H_{NH_3} RTAWC + 1}{H_{NH_3} RTAWC} \right) + \log_{10} \left( \frac{[NH_3(g)] (H_{NH_3} RTAWC + 1)}{[a_{NH_4^+(aq)}]} \right) \\ &= \log_{10} \left( \frac{[NH_3(g)] AWC}{[a_{NH_4^+(aq)}]} \frac{H_{NH_3} RT}{K_{a,NH_3}} \right) \\ &= \log_{10} \left( \frac{p_{NH_3}}{[NH_4^+(aq)] \gamma_{NH_4^+(aq)}} \frac{H_{NH_3}}{K_{a,NH_3}} \right) \\ &= \log_{10} \left( \frac{p_{NH_3}}{[NH_4^+(aq)] \gamma_{NH_4^+(aq)}} \right) + C_T \end{aligned}$$

$C_T = \log_{10} \left( \frac{H_{\text{NH}_3}}{K_{\text{a,NH}_3}} \right)$  can be simplified as a constant given the limited temperature variation in winter in the North China

Plain. Ultimately, pH can be considered as a function of  $p_{\text{NH}_3}$ ,  $[\text{NH}_4^+(\text{aq})]$ , and  $\gamma_{\text{NH}_4^+(\text{aq})}$ .

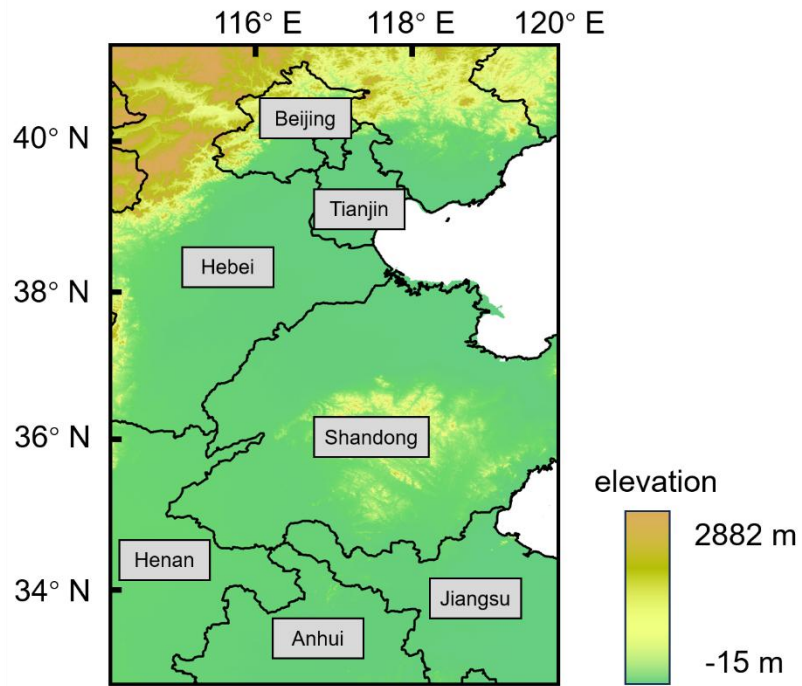

55 **Figure S1.** Topographic map of the study region. The North China Plain is situated in northern China and spans a latitude and longitude range of 33°N–41°N, 114.375°E–120°E in the GEOS-Chem model domain, covering a total of 162 grids horizontally.

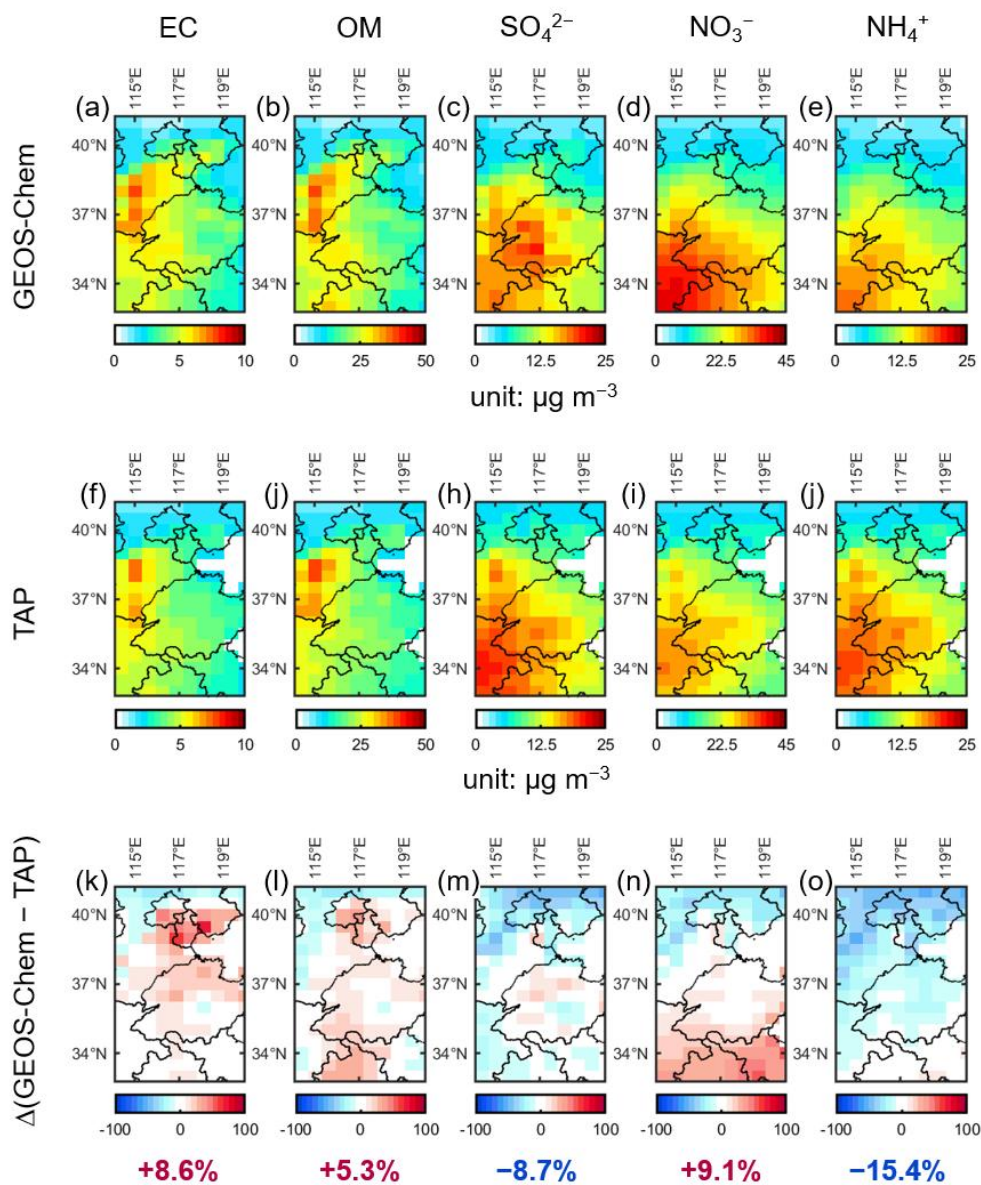

60 **Figure S2.** Evaluation of the GEOS-Chem chemical transport model simulation during winter 2018 using the TAP reanalysis data product. EC (elemental carbon), OM (organic material),  $\text{SO}_4^{2-}$ ,  $\text{NO}_3^-$ , and  $\text{NH}_4^+$  (corresponding to the first through fifth columns, respectively) were chosen as validation species. The first row displayed the GEOS-Chem simulations ( $\mu\text{g m}^{-3}$ ). The second row represented the concentration from TAP ( $\mu\text{g m}^{-3}$ ), serving as a standard for comparison. The third row presented the percentage of relative difference (%), where positive and negative values indicated model overestimation and underestimation, respectively.

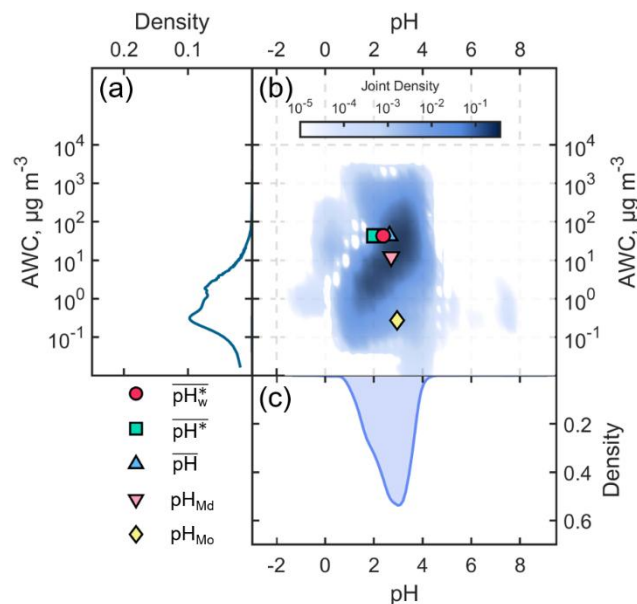

65

**Figure S3.** Same as Fig. 1, but for summer (June, July, and August) 2019. Probability distributions of (a) aerosol water content (AWC,  $\mu\text{g m}^{-3}$ ) and (c) aerosol pH, and (b) the joint probability distribution of AWC and aerosol pH. The position of the blue triangle is based on the  $\overline{\text{pH}}$  and the  $\overline{\text{AWC}}$ , the pink inverted triangle is based on the  $\text{pH}_{\text{Md}}$  and the  $\text{AWC}_{\text{Md}}$ , the yellow diamond is based on the  $\text{pH}_{\text{Mo}}$  and the  $\text{AWC}_{\text{Mo}}$ , the green square is based on the  $\overline{\text{pH}}^*$  and the  $\overline{\text{AWC}}$ , and red circle is based on  $\overline{\text{pH}}_w^*$  and  $\overline{\text{AWC}}$ .

70



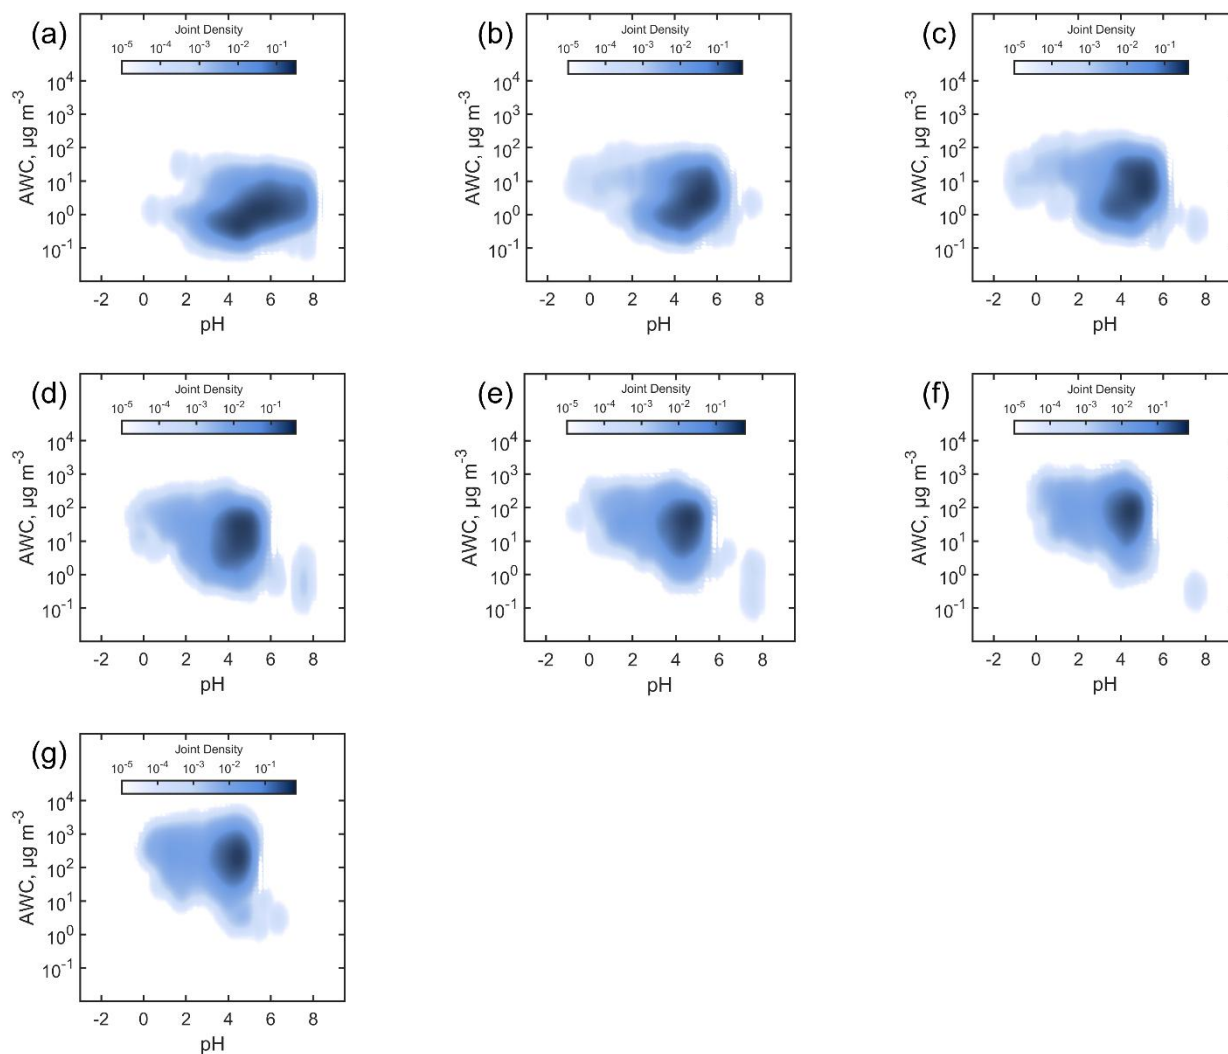

**Figure S4.** (a) Probability distributions of the joint probability distribution of AWC and aerosol pH for RH between 25% and 35%. (b-g) are the same as (a), but the RH ranges from 35% to 95% in 10% intervals.

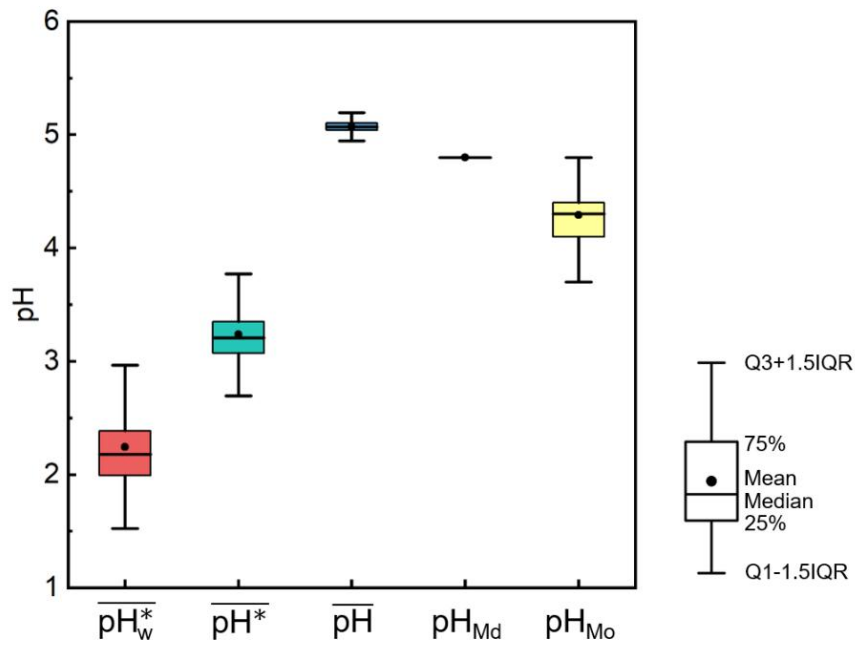

75

**Figure S5.** Dispersion in the calculations of  $\overline{pH}$ ,  $pH_{Md}$ ,  $pH_{Mo}$ ,  $\overline{pH}^*$ , and  $\overline{pH}_w^*$  in the pseudo-observation data for Beijing in winter 2018, based on Bootstrap. The results were extracted from 1,000 new datasets, each containing 720 sets of data. In the box-whisker plots, the points indicate means, the whiskers, and boxes indicate the values greater than the sum of the upper quartile and 1.5 times IQR, 75th percentiles, 50th percentiles, 25th percentiles, the values less than the sum of the lower quartile and 1.5 times IQR, respectively. The means of  $\overline{pH}$ ,  $pH_{Md}$ ,  $pH_{Mo}$ ,  $\overline{pH}^*$ , and  $\overline{pH}_w^*$  calculated for each of these 1,000 datasets were 5.1, 4.8, 4.3, 3.2, and 2.2, respectively, slightly different from the Beijing pseudo-observation data (5.1, 4.8, 4.4, 3.2, and 2.1). The stability of the results was good, but higher than that of the North China Plain, with interquartile distances of 0.06, 0, 0.3, 0.3 and 0.4, respectively.

80

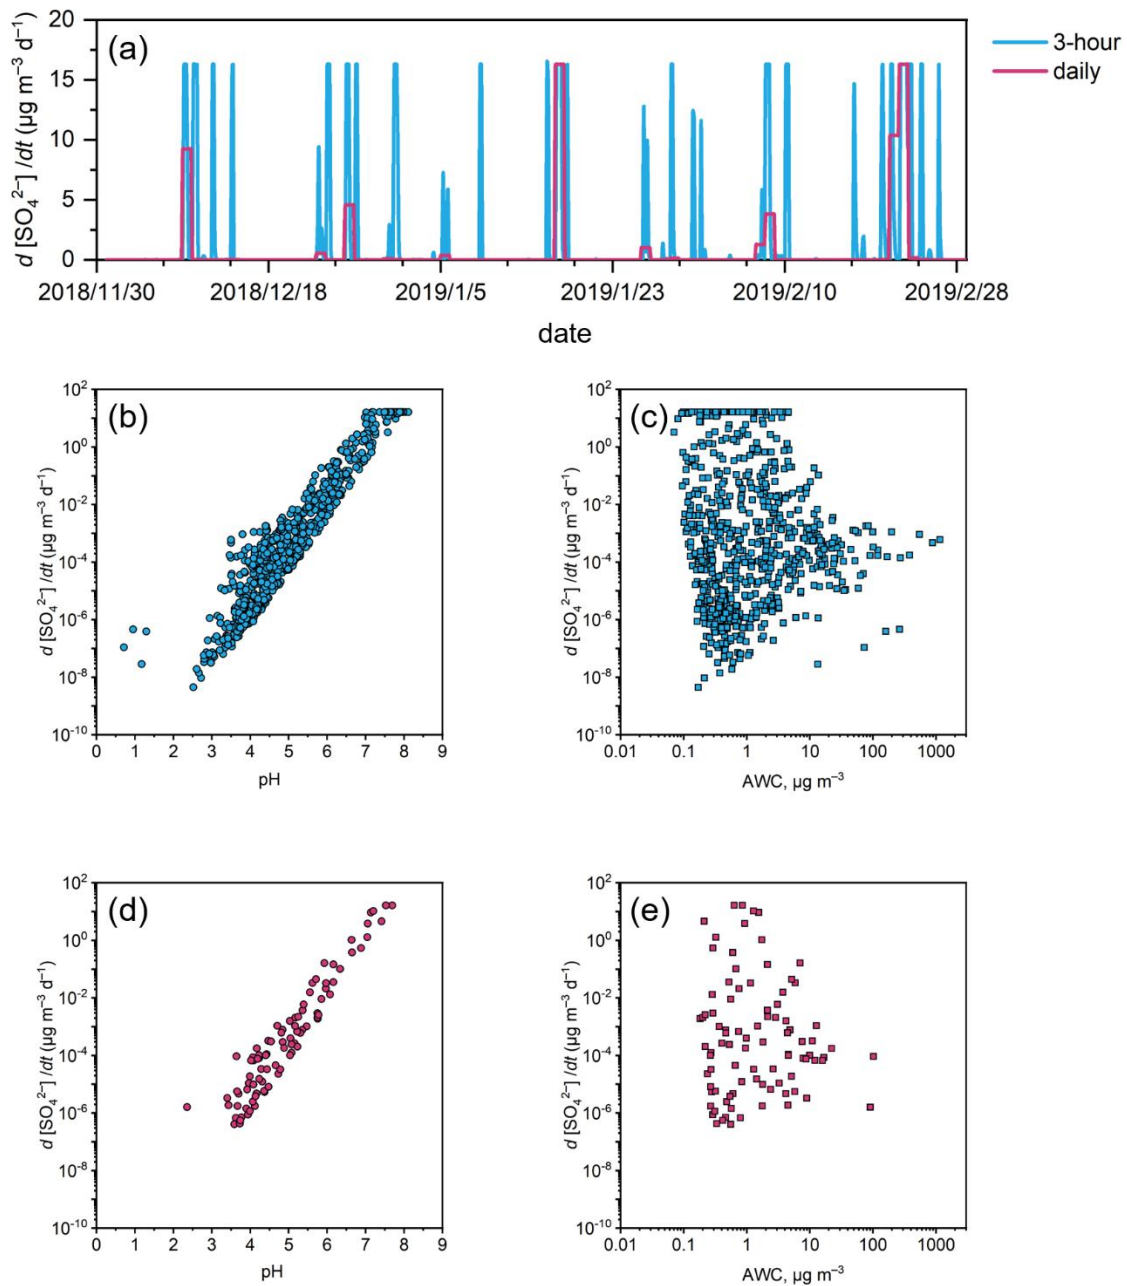

85 **Figure S6.** (a) Comparison of the trends in sulfate formation rates based on 3-hour (blue line) and daily (pink line) resolution data; (b)  $d(\text{SO}_4^{2-})/dt$  vs. pH and (c)  $d(\text{SO}_4^{2-})/dt$  vs. AWC based on 3-hour resolution data; (d)  $d(\text{SO}_4^{2-})/dt$  vs. pH and (e)  $d(\text{SO}_4^{2-})/dt$  vs. AWC based on daily resolution data.

**Table S1. Reported aerosol pH from thermodynamic modeling based on chemical transport model simulation data and field observational data**

| Area                                            | Period            | Data sources          | Average metric                                 | Time resolution | Average pH                         | Reference                 |
|-------------------------------------------------|-------------------|-----------------------|------------------------------------------------|-----------------|------------------------------------|---------------------------|
| <b>Chemical transport model simulation data</b> |                   |                       |                                                |                 |                                    |                           |
| U.S.                                            | 2050 <sup>a</sup> | WRF-CMAQ              | $\overline{\text{pH}}^{\text{r}}$ <sup>b</sup> | hourly, daily   | 1.8                                | Chen et al. (2019)        |
| U.S.                                            | 2011              | WRF-CMAQ              | $\overline{\text{pH}}$                         | not clear       | $1.8 \pm 0.5$                      | Zhang et al. (2021)       |
| Eastern U.S.                                    | 2001              | WRF-CMAQ              | pH                                             | annual          | 1.6                                | Vasilakos et al. (2018)   |
|                                                 | 2011              |                       |                                                |                 | 2.5                                |                           |
| Midwestern U.S.                                 | 2001 and 2011     | WRF-CMAQ              | $\overline{\text{pH}}$                         | seasonal        | 3.5 – 4.0                          | Lawal et al. (2018)       |
| Southeastern U.S.                               |                   |                       |                                                |                 | 1.5 – 2.0                          |                           |
| North China Plain, China                        | 2011              | WRF-CMAQ              | $\overline{\text{pH}}$                         | not clear       | $3.8 \pm 0.2$                      | Zhang et al. (2021)       |
| Beijing, China                                  | Jan 2013          | WRF-Chem              | not clear                                      | hourly          | 5.4                                | Tao et al. (2020)         |
| North China Plain, China                        | Oct–Nov 2014      | WRF-Chem <sup>c</sup> | $\overline{\text{pH}}_{\text{w}}$              | not clear       | $2.3 \pm 0.4$                      | Ruan et al. (2022)        |
| <b>Field observational data</b>                 |                   |                       |                                                |                 |                                    |                           |
| U.S.                                            | 2011              |                       | $\overline{\text{pH}}$                         | weekly          | $2.7 \pm 0.8$                      | Zhang et al. (2021)       |
| Centerville, U.S.                               | 2008–2015         |                       | $\overline{\text{pH}}$                         | seasonal        | 0.7                                | Lawal et al. (2018)       |
|                                                 |                   |                       |                                                | monthly         | 0.2                                |                           |
| Southeast U.S.                                  | May–Dec 2012      |                       | $\overline{\text{pH}}$                         | hourly          | $0.9 \pm 0.6$                      | Guo et al. (2015)         |
| California, U.S.                                | May–Jun 2010      |                       | $\overline{\text{pH}}$                         | hourly          | $1.9 \pm 0.5$ (PM <sub>1</sub> )   | Guo et al. (2017)         |
|                                                 |                   |                       |                                                |                 | $2.7 \pm 0.3$ (PM <sub>2.5</sub> ) |                           |
| Georgia, U.S.                                   | Autumn 2016       |                       | $\overline{\text{pH}}$                         | hourly          | $2.2 \pm 0.6$ (PM <sub>1</sub> )   | Nah et al. (2018)         |
| Mexico City, Mexico                             | Mar–Apr 2006      |                       | $\overline{\text{pH}}$                         | 10 min          | 3.3                                | Hennigan et al. (2015)    |
| Finokalia, Greece                               | Aug–Nov 2012      |                       | $\overline{\text{pH}}$                         | 30 min          | $1.3 \pm 1.1$ (PM <sub>1</sub> )   | Bougiatioti et al. (2016) |
| Veneto, Greece                                  | Dec 2012–Feb 2013 |                       | $\overline{\text{pH}}$                         | daily           | $3.9 \pm 0.3$                      | Masiol et al. (2020)      |
|                                                 | Jun–Aug 2012      |                       |                                                |                 | $2.2 \pm 0.3$                      |                           |
| Seoul, South Korea                              | May–Jun 2016      |                       | $\overline{\text{pH}}$                         | hourly          | $2.5 \pm 0.7$                      | Kim et al. (2022)         |
| Indo-Gangetic Plain, India                      | Summer 2018       |                       | $\overline{\text{pH}}$                         | daily           | $2.9 \pm 0.7$                      | Sharma et al. (2022)      |
|                                                 | Autumn 2018       |                       |                                                |                 | $2.7 \pm 0.2$                      |                           |
|                                                 | Winter 2018       |                       |                                                |                 | $3.2 \pm 0.3$                      |                           |
| Indo-Gangetic Plain, India                      | Winter 2017       |                       | $\overline{\text{pH}}$                         | hourly          | $4.5 \pm 0.5$ (PM <sub>1</sub> )   | Acharja et al. (2023)     |
|                                                 |                   |                       |                                                |                 | $4.6 \pm 0.5$ (PM <sub>2.5</sub> ) |                           |
| Beijing, China                                  | Winter 2015–2016  |                       | not clear                                      | hourly          | 4.2                                | Liu et al. (2017)         |
| Beijing, China                                  | Dec 2016          |                       | $\overline{\text{pH}}$                         | hourly          | $5.6 \pm 0.8$                      | Meng et al. (2020)        |
| Beijing, China                                  | Spring 2016       |                       | $\overline{\text{pH}}$                         | hourly          | $4.4 \pm 1.2$                      | Ding et al. (2019)        |
|                                                 | Summer 2017       |                       |                                                |                 | $4.5 \pm 0.7$                      |                           |
|                                                 | Autumn 2017       |                       |                                                |                 | $3.8 \pm 1.2$                      |                           |
|                                                 | Winter 2017       |                       |                                                |                 | $4.3 \pm 0.8$                      |                           |
| Tianjin, China                                  | Dec 2014–Jun 2015 |                       | $\overline{\text{pH}}$                         | hourly          | $4.9 \pm 1.4$                      | Shi et al. (2017)         |
| Gucheng, China                                  | Winter 2016       |                       | not clear                                      | daily           | 5.3                                | Chi et al. (2018)         |
| Zhengzhou, China                                | Winter 2019       |                       | $\overline{\text{pH}}$                         | hourly          | $4.4 \pm 1.5$                      | Jiang et al. (2022)       |
| Shanghai, China                                 | Feb 2012          |                       | $\overline{\text{pH}}$                         | hourly          | 2.9 (haze)                         | Kong et al. (2018)        |
|                                                 |                   |                       |                                                |                 | 3.1 (clean)                        |                           |
| Shanghai, China                                 | Spring 2011–2019  |                       | $\overline{\text{pH}}$                         | hourly          | $3.3 \pm 0.5$                      | Zhou et al. (2022)        |
|                                                 | Summer 2011–2019  |                       |                                                |                 | $2.9 \pm 0.5$                      |                           |
|                                                 | Autumn 2011–2019  |                       |                                                |                 | $3.0 \pm 0.5$                      |                           |
|                                                 | Winter 2011–2019  |                       |                                                |                 | $3.6 \pm 0.6$                      |                           |

|                  |                   |                        |        |               |                    |
|------------------|-------------------|------------------------|--------|---------------|--------------------|
| Shanghai, China  | Spring 2019–2020  | $\overline{\text{pH}}$ | hourly | $3.1 \pm 0.5$ | Fu et al. (2022)   |
|                  | Summer 2019–2020  |                        |        | $2.6 \pm 0.5$ |                    |
|                  | Autumn 2019–2020  |                        |        | $2.7 \pm 0.6$ |                    |
|                  | Winter 2019–2020  |                        |        | $3.5 \pm 0.4$ |                    |
| Guangzhou, China | Nov 2012–Oct 2013 | $\overline{\text{pH}}$ | hourly | $2.5 \pm 0.7$ | Jia et al. (2020)  |
| Shenzhen, China  | Sep–Oct 2019      | $\overline{\text{pH}}$ | hourly | $1.6 \pm 0.5$ | Wang et al. (2022) |

Unless noted, the thermodynamic models used in this table are ISORROPIA-II with the forward mode (using total (gas plus aerosol phase) concentrations as model inputs) assumption.

<sup>a</sup> The 2050 emissions were estimated from a future baseline scenario based on the RCP4.5 pathway.

<sup>b</sup> Daily average aerosol pH values were calculated using daily average equilibrium  $\text{H}^+$  concentrations and AWC based on the CMAQ hourly output. Annual average aerosol pH was then calculated by averaging the daily aerosol pH.

<sup>c</sup> WRF-Chem used the MOSAIC thermodynamic scheme to predict aerosol pH.

**Table S2. Rate expression and rate coefficients of aqueous-phase reaction of SO<sub>2</sub> oxidation by O<sub>3</sub>**

| Oxidants       | Rate Expression, -d[S(IV)]/dt                                                                                                                                                                                                                                                                                                                 | Reference           |
|----------------|-----------------------------------------------------------------------------------------------------------------------------------------------------------------------------------------------------------------------------------------------------------------------------------------------------------------------------------------------|---------------------|
| O <sub>3</sub> | $(k_0[\text{SO}_2 \cdot \text{H}_2\text{O}] + k_1[\text{HSO}_3^-] + k_2[\text{SO}_3^{2-}])[\text{O}_3(\text{aq})]$<br>$k_0 = 2.4 \times 10^4 \text{ M}^{-1} \text{ s}^{-1}$<br>$k_1 = 3.7 \times 10^5 \text{ M}^{-1} \text{ s}^{-1}, E/R = 5530 \text{ K}^a$<br>$k_2 = 1.5 \times 10^9 \text{ M}^{-1} \text{ s}^{-1}, E/R = 5280 \text{ K}^a$ | Cheng et al. (2016) |

<sup>a</sup> According to the Arrhenius equation, the relationship between the kinetic constant  $k$  and the temperature  $T$  can be expressed as  $k(T) = k(T_0) \exp[-\frac{E}{R}(\frac{1}{T} - \frac{1}{T_0})]$ , where

100

 $T_0 = 298 \text{ K}$ .

**Table S3. The calculation of the apparent Henry's constant ( $H^*$ )**

| Gas-Aqueous Equilibrium for S(IV)                 |                 |                                                |                         |
|---------------------------------------------------|-----------------|------------------------------------------------|-------------------------|
| Equilibrium                                       | Constant Symbol | $H_{298K}$ (M atm <sup>-1</sup> ) <sup>a</sup> | $-\Delta H_{298K}/R(K)$ |
| $SO_2(g) \leftrightarrow SO_2(aq)$                | $H_{SO_2}$      | 1.23                                           | 3145.3                  |
| $O_3(g) \leftrightarrow O_3(aq)$                  | $H_{O_3}$       | $1.1 \times 10^{-2}$                           | 2536.4                  |
| Aqueous-phase Ionization Equilibrium <sup>b</sup> |                 |                                                |                         |
| Equilibrium                                       | Constant Symbol | $H_{298K}$ (M atm <sup>-1</sup> ) <sup>a</sup> | $-\Delta H_{298K}/R(K)$ |
| $SO_2 \cdot H_2O \leftrightarrow H^+ + HSO_3^-$   | $K_{S1}$        | $1.3 \times 10^{-2}$                           | 1960                    |
| $HSO_3^- \leftrightarrow H^+ + SO_3^{2-}$         | $K_{S2}$        | $6.6 \times 10^{-8}$                           | 1500                    |

<sup>a</sup> The Henry's constant (H) and ionization constant (K) both demonstrate a similar temperature dependence. The H at temperature T is  $H(T) = H(T_0) \exp\left[-\frac{\Delta H_{298K}}{R}\left(\frac{1}{T} - \frac{1}{T_0}\right)\right]$ , where  $T_0 = 298$  K. The same is true for K(T).

105 <sup>b</sup> The effective Henry's constant ( $H^*$ ) for  $HSO_3^-$  and  $SO_3^{2-}$  are respectively

$$H_{HSO_3^-}^* = H_{SO_2} \frac{K_{S1}}{[H^+]}$$

$$H_{SO_3^{2-}}^* = H_{SO_2} \frac{K_{S1}K_{S2}}{[H^+]^2}$$

where  $H_{SO_2}$ ,  $K_{S1}$ , and  $K_{S2}$  are corresponding values at temperature T.

- Acharja, P., Ghude, S., Sinha, B., Barth, M., Govardhan, G., Kulkarni, R., Sinha, V., Kumar, R., Ali, K., Gultepe, I., Petit, J. E., and Rajeevan, M.: Thermodynamical framework for effective mitigation of high aerosol loading in the Indo-Gangetic Plain during winter, *Sci. Rep.*, 13, 13667, 10.1038/s41598-023-40657-w, 2023.
- Amos, H. M., Jacob, D. J., Holmes, C. D., Fisher, J. A., Wang, Q., Yantosca, R. M., Corbitt, E. S., Galarneau, E., Rutter, A. P., Gustin, M. S., Steffen, A., Schauer, J. J., Graydon, J. A., Louis, V. L. S., Talbot, R. W., Edgerton, E. S., Zhang, Y., and Sunderland, E. M.: Gas-particle partitioning of atmospheric Hg(II) and its effect on global mercury deposition, *Atmos. Chem. Phys.*, 12, 591-603, 10.5194/acp-12-591-2012, 2012.
- Bougiatioti, A., Nikolaou, P., Stavroulas, I., Kouvarakis, G., Weber, R., Nenes, A., Kanakidou, M., and Mihalopoulos, N.: Particle water and pH in the eastern Mediterranean: source variability and implications for nutrient availability, *Atmos. Chem. Phys.*, 16, 4579-4591, 10.5194/acp-16-4579-2016, 2016.
- Chen, Y., Shen, H., and Russell, A.: Current and Future Responses of Aerosol pH and Composition in the U.S. to Declining SO<sub>2</sub> Emissions and Increasing NH<sub>3</sub> Emissions, *Environ. Sci. Technol.*, 53, 9646-9655, 10.1021/acs.est.9b02005, 2019.
- Cheng, Y., Zheng, G., Wei, C., Mu, Q., Zheng, B., Wang, Z., Gao, M., Zhang, Q., He, K., Carmichael, G., Pöschl, U., and Su, H.: Reactive nitrogen chemistry in aerosol water as a source of sulfate during haze events in China, *Sci. Adv.*, 2, e1601530, 10.1126/sciadv.1601530, 2016.
- Chi, X., He, P., Jiang, Z., Yu, X., Yue, F., Wang, L., Li, B., Kang, H., Liu, C., and Xie, Z.: Acidity of Aerosols during Winter Heavy Haze Events in Beijing and Gucheng, China, *J. Meteorol. Res.*, 32, 14-25, 10.1007/s13351-018-7063-4, 2018.
- Ding, J., Zhao, P., Su, J., Dong, Q., Du, X., and Zhang, Y.: Aerosol pH and its driving factors in Beijing, *Atmos. Chem. Phys.*, 19, 7939-7954, 10.5194/acp-19-7939-2019, 2019.
- Duncan, F. T., Jacob, D. J., and Park, R. J.: The impact of transpacific transport of mineral dust in the United States, *Atmospheric Environ.*, 41, 1251-1266, 10.1016/j.atmosenv.2006.09.048, 2007.
- Fu, Z., Cheng, L., Ye, X., Ma, Z., Wang, R., Duan, Y. S., Juntao, H., and Chen, J.: Characteristics of aerosol chemistry and acidity in Shanghai after PM<sub>2.5</sub> satisfied national guideline: Insight into future emission control, *Sci. Total Environ.*, 827, 154319, 10.1016/j.scitotenv.2022.154319, 2022.
- Ge, C., Wang, J., Carn, S., Yang, K., Ginoux, P., and Krotkov, N.: Satellite-based global volcanic SO<sub>2</sub> emissions and sulfate direct radiative forcing during 2005–2012, *J. Geophys. Res.-Atmos.*, 121, 3446-3464, 10.1002/2015JD023134, 2016.
- Guenther, A. B., Jiang, X., Heald, C. L., Sakulyanontvittaya, T., Duhl, T., Emmons, L. K., and Wang, X.: The Model of Emissions of Gases and Aerosols from Nature version 2.1 (MEGAN2.1): an extended and updated framework for modeling biogenic emissions, *Geosci. Model Dev.*, 5, 1471-1492, 10.5194/gmd-5-1471-2012, 2012.
- Guo, H., Liu, J., Froyd, K. D., Roberts, J. M., Veres, P. R., Hayes, P. L., Jimenez, J. L., Nenes, A., and Weber, R. J.: Fine particle pH and gas-particle phase partitioning of inorganic species in Pasadena, California, during the 2010 CalNex campaign, *Atmos. Chem. Phys.*, 17, 5703-5719, 10.5194/acp-17-5703-2017, 2017.
- Guo, H., Xu, L., Bougiatioti, A., Cerully, K. M., Capps, S. L., Hite Jr, J. R., Carlton, A. G., Lee, S. H., Bergin, M. H., Ng, N. L., Nenes, A., and Weber, R. J.: Fine-particle water and pH in the southeastern United States, *Atmos. Chem. Phys.*, 15, 5211-5228, 10.5194/acp-15-5211-2015, 2015.
- Hennigan, C. J., Izumi, J., Sullivan, A. P., Weber, R. J., and Nenes, A.: A critical evaluation of proxy methods used to estimate the acidity of atmospheric particles, *Atmos. Chem. Phys.*, 15, 2775-2790, 10.5194/acp-15-2775-2015, 2015.
- Hoesly, R. M., Smith, S. J., Feng, L. Y., Klimont, Z., Janssens-Maenhout, G., Pitkanen, T., Seibert, J. J., Vu, L., Andres, R. J., Bolt, R. M., Bond, T. C., Dawidowski, L., Kholod, N., Kurokawa, J., Li, M., Liu, L., Lu, Z. F., Moura, M. C. P., O'Rourke, P. R., and Zhang, Q.: Historical (1750-2014) anthropogenic emissions of reactive gases and aerosols from the Community Emissions Data System (CEDS), *Geosci. Model Dev.*, 11, 369-408, 10.5194/gmd-11-369-2018, 2018.
- Hudman, R. C., Moore, N. E., Mebust, A. K., Martin, R. V., Russell, A. R., Valin, L. C., and Cohen, R. C.: Steps towards a mechanistic model of global soil nitric oxide emissions: implementation and space based-constraints, *Atmos. Chem. Phys.*, 12, 7779-7795, 10.5194/acp-12-7779-2012, 2012.
- Jia, S., Chen, W., Zhang, Q., Krishnan, P., Mao, J., Zhong, B., Huang, M., Fan, Q., Zhang, J., Chang, M., Yang, L., and Wang,



X.: A quantitative analysis of the driving factors affecting seasonal variation of aerosol pH in Guangzhou, China, *Sci. Total Environ.*, 725, 138228, 10.1016/j.scitotenv.2020.138228, 2020.

- Jiang, N., Wei, Y., Zhang, R., Hao, Q., Hao, X., Zhang, C., and Hu, R.: Modeling of reducing NH<sub>4</sub>NO<sub>3</sub> in PM<sub>2.5</sub> under high ammonia emission in urban areas: Based on high-resolution data, *J. Clean. Prod.*, 350, 131499, 10.1016/j.jclepro.2022.131499, 2022.
- Kim, Y., Park, O., Park, S. H., Kim, M. J., Kim, J. Y., Choi, J., Lee, D., Cho, S., and Shim, S.: PM<sub>2.5</sub> pH estimation in Seoul during the KORUS-AQ campaign using different thermodynamic models, *Atmospheric Environ.*, 268, 118787, 10.1016/j.atmosenv.2021.118787, 2022.
- Kong, L., Du, C., Zhanzakova, A., Cheng, T., Yang, X., Wang, L., Fu, H., Chen, J., and Zhang, S.: Trends in heterogeneous aqueous reaction in continuous haze episodes in suburban Shanghai: An in-depth case study, *Sci. Total Environ.*, 634, 1192-1204, 10.1016/j.scitotenv.2018.04.086, 2018.
- Kong, L., Tang, X., Zhu, J., Wang, Z., Pan, Y., Wu, H., Wu, L., Wu, Q., He, Y., Tian, S. L., Xie, Y., Liu, Z. R., Sui, W., Han, L., and Carmichael, G.: Improved Inversion of Monthly Ammonia Emissions in China Based on the Chinese Ammonia Monitoring Network and Ensemble Kalman Filter, *Environ. Sci. Technol.*, 53, 12529-12538, 10.1021/acs.est.9b02701, 2019.
- Lawal, A., Guan, X., Liu, C., Henneman, L. R. F., Vasilakos, P., Bhogineni, V., Weber, R., Nenes, A., and Russell, A.: Linked Response of Aerosol Acidity and Ammonia to SO<sub>2</sub> and NO<sub>x</sub> Emissions Reductions in the United States, *Environ. Sci. Technol.*, 52, 9861-9873, 10.1021/acs.est.8b00711, 2018.
- Li, M., Zhang, Q., Kurokawa, J., Woo, J. H., He, K. B., Lu, Z. F., Ohara, T., Song, Y., Streets, D. G., Carmichael, G. R., Cheng, Y. F., Hong, C. P., Huo, H., Jiang, X. J., Kang, S. C., Liu, F., Su, H., and Zheng, B.: MIX: a mosaic Asian anthropogenic emission inventory under the international collaboration framework of the MICS-Asia and HTAP, *Atmos. Chem. Phys.*, 17, 935-963, 10.5194/acp-17-935-2017, 2017.
- Lin, H., Jacob, D. J., Lundgren, E. W., Sulprizio, M. P., Keller, C. A., Fritz, T. M., Eastham, S. D., Emmons, L. K., Campbell, P. C., Baker, B., Saylor, R. D., and Montuoro, R.: Harmonized Emissions Component (HEMCO) 3.0 as a versatile emissions component for atmospheric models: application in the GEOS-Chem, NASA GEOS, WRF-GC, CESM2, NOAA GEFS-Aerosol, and NOAA UFS models, *Geosci. Model Dev.*, 14, 5487-5506, 10.5194/gmd-14-5487-2021, 2021.
- Liu, M., Song, Y., Zhou, T., Xu, Z., Yan, C., Zheng, M., Wu, Z., Hu, M., Wu, Y., and Zhu, T.: Fine particle pH during severe haze episodes in northern China, *Geophys. Res. Lett.*, 44, 5213-5221, 10.1002/2017GL073210, 2017.
- Masiol, M., Squizzato, S., Formenton, G., Khan, M. B., Hopke, P. K., Nenes, A., Pandis, S. N., Tositti, L., Benetello, F., Visin, F., and Pavoni, B.: Hybrid multiple-site mass closure and source apportionment of PM<sub>2.5</sub> and aerosol acidity at major cities in the Po Valley, *Sci. Total Environ.*, 704, 135287, 10.1016/j.scitotenv.2019.135287, 2020.
- Meng, Z., Wu, L., Xu, X., Xu, W., Zhang, R., Jia, X., Liang, L., Miao, Y., Cheng, H. F., Xie, Y., He, J., and Zhong, J. T.: Changes in ammonia and its effects on PM<sub>2.5</sub> chemical property in three winter seasons in Beijing, China, *Sci. Total Environ.*, 749, 142208, 10.1016/j.scitotenv.2020.142208, 2020.
- Murray, L. T., Jacob, D. J., Logan, J. A., Hudman, R. C., and Koshak, W. J.: Optimized regional and interannual variability of lightning in a global chemical transport model constrained by LIS/OTD satellite data, *J. Geophys. Res.-Atmos.*, 117, D20307, 10.1029/2012JD017934, 2012.
- Nah, T., Guo, H., Sullivan, A. P., Chen, Y., Tanner, D. J., Nenes, A., Russell, A., Ng, N. L., Huey, L. G., and Weber, R. J.: Characterization of aerosol composition, aerosol acidity, and organic acid partitioning at an agriculturally intensive rural southeastern US site, *Atmos. Chem. Phys.*, 18, 11471-11491, 10.5194/acp-18-11471-2018, 2018.
- Ruan, X., Zhao, C., Zaveri, R. A., He, P., Wang, X., Shao, J., and Geng, L.: Simulations of aerosol pH in China using WRF-Chem (v4.0): sensitivities of aerosol pH and its temporal variations during haze episodes, *Geosci. Model Dev.*, 15, 6143-6164, 10.5194/gmd-15-6143-2022, 2022.
- Sharma, B., Jia, S., Polana, A. J., Ahmed, M. S., Haque, R. R., Singh, S., Mao, J., and Sarkar, S.: Seasonal variations in aerosol acidity and its driving factors in the eastern Indo-Gangetic Plain: A quantitative analysis, *Chemosphere*, 305, 135490, 10.1016/j.chemosphere.2022.135490, 2022.

- Shi, G., Xu, J., Peng, X., Xiao, Z., Chen, K., Tian, Y., Guan, X., Feng, Y., Yu, H., Nenes, A., and Russell, A. G.: pH of Aerosols in a Polluted Atmosphere: Source Contributions to Highly Acidic Aerosol, *Environ. Sci. Technol.*, 51, 4289-4296, 10.1021/acs.est.6b05736, 2017.
- 205 Tao, W., Su, H., Zheng, G., Wang, J., Wei, C., Liu, L., Ma, N., Li, M., Zhang, Q., Pöschl, U., and Cheng, Y.: Aerosol pH and chemical regimes of sulfate formation in aerosol water during winter haze in the North China Plain, *Atmos. Chem. Phys.*, 20, 11729-11746, 10.5194/acp-20-11729-2020, 2020.
- 210 van der Werf, G. R., Randerson, J. T., Giglio, L., van Leeuwen, T. T., Chen, Y., Rogers, B. M., Mu, M., van Marle, M. J. E., Morton, D. C., Collatz, G. J., Yokelson, R. J., and Kasibhatla, P. S.: Global fire emissions estimates during 1997–2016, *Earth Syst. Sci. Data*, 9, 697-720, 10.5194/essd-9-697-2017, 2017.
- Vasilakos, P., Russell, A., Weber, R., and Nenes, A.: Understanding nitrate formation in a world with less sulfate, *Atmos. Chem. Phys.*, 18, 12765-12775, 10.5194/acp-18-12765-2018, 2018.
- 215 Wang, G., Chen, J., Xu, J., Yun, L., Zhang, M., Li, H., Qin, X., Deng, C., Zheng, H. T., Gui, H., Liu, J., and Huang, K.: Atmospheric Processing at the Sea-Land Interface Over the South China Sea: Secondary Aerosol Formation, Aerosol Acidity, and Role of Sea Salts, *J. Geophys. Res.-Atmos.*, 127, e2021JD036255, 10.1029/2021JD036255, 2022.
- Wang, H., Zhang, D., Zhang, Y., Zhai, L., Yin, B., Zhou, F., Geng, Y., Pan, J., Luo, J., Gu, B., and Liu, H.: Ammonia emissions from paddy fields are underestimated in China, *Environ. Pollut.*, 235, 482-488, 10.1016/j.envpol.2017.12.103, 2018.
- 220 Wang, H., Li, J., Wu, T., Ma, T., Wei, L. F., Zhang, H., Yang, X., Munger, J. W., Duan, F., Zhang, Y., Feng, Y., Zhang, Q., Sun, Y., Fu, P. Q., McElroy, M. B., and Song, S.: Model Simulations and Predictions of Hydroxymethanesulfonate (HMS) in the Beijing-Tianjin-Hebei Region, China: Roles of Aqueous Aerosols and Atmospheric Acidity, *Environ Sci Technol*, 58, 1589-1600, 10.1021/acs.est.3c07306, 2024.
- 225 Wang, S., Liu, T., Jang, J., Abbatt, J. P. D., and Chan, A. W. H.: Heterogeneous interactions between SO<sub>2</sub> and organic peroxides in submicron aerosol, *Atmos. Chem. Phys.*, 21, 6647-6661, 10.5194/acp-21-6647-2021, 2021.
- Wang, Y., Zhang, Q., Jiang, J. K., Zhou, W., Wang, B., He, K., Duan, F., Zhang, Q., Philip, S., and Xie, Y.: Enhanced sulfate formation during China's severe winter haze episode in January 2013 missing from current models, *J. Geophys Res-Atmos*, 119, 425-410,440, 10.1002/2013JD021426, 2014.
- 230 Wesely, M. L.: Parameterization of surface resistances to gaseous dry deposition in regional-scale numerical models, *Atmospheric Environ.*, 23, 1293-1304, 10.1016/0004-6981(89)90153-4, 1989.
- Zhang, B., Shen, H., Liu, P., Guo, H., Hu, Y., Chen, Y., Xie, S., Xi, Z., Skipper, T. N., and Russell, A. G.: Significant contrasts in aerosol acidity between China and the United States, *Atmos. Chem. Phys.*, 21, 8341-8356, 10.5194/acp-21-8341-2021, 2021.
- 235 Zhang, L., Chen, Y., Zhao, Y., Henze, D. K., Zhu, L., Song, Y., Paulot, F., Liu, X., Pan, Y., Lin, Y., and Huang, B.: Agricultural ammonia emissions in China: reconciling bottom-up and top-down estimates, *Atmos. Chem. Phys.*, 18, 339-355, 10.5194/acp-18-339-2018, 2018.
- Zheng, B., Tong, D., Li, M., Liu, F., Hong, C. P., Geng, G. N., Li, H. Y., Li, X., Peng, L. Q., Qi, J., Yan, L., Zhang, Y. X., Zhao, H. Y., Zheng, Y. X., He, K. B., and Zhang, Q.: Trends in China's anthropogenic emissions since 2010 as the consequence of clean air actions, *Atmos. Chem. Phys.*, 18, 14095-14111, 10.5194/acp-18-14095-2018, 2018.
- 240 Zheng, G., Su, H., Wang, S., Andreae, M., Pöschl, U., and Cheng, Y.: Multiphase buffer theory explains contrasts in atmospheric aerosol acidity, *Science*, 369, 1374-1377, 10.1126/science.aba3719, 2020.
- Zhou, M., Zheng, G., Wang, H., Qiao, L., Zhu, S., Huang, D., An, J., Lou, S., Tao, S., Wang, Q., Yan, R., Ma, Y., Chen, C., Cheng, Y., Su, H., and Huang, C.: Long-term trends and drivers of aerosol pH in eastern China, *Atmos. Chem. Phys.*, 22, 13833-13844, 10.5194/acp-22-13833-2022, 2022.
- 245
